# Supplementary material for: Reconstructing the Evolutionary History of Pinna nobilis: New Genetic Signals from the Past of a Species on the Brink of Extinction
Source: MDPI journal article supplement (doi:10.3390/ani14010114), 2023-12-28
Supplement: s1 [file s1]

**Table S1.** Principal coordinates analysis. The table reports the results of the principal coordinates analysis performed on the whole COI fragment dataset.

| G1          |                                            |                 |
|-------------|--------------------------------------------|-----------------|
| Sample code | Sampling site                              | Sampling Area   |
| MAR33       | Marceddì                                   | Sardinia        |
| VEN12       | Ottagono Alberoni and Santa Maria del Lago | Venetian Lagoon |
| OGN8        | Ognina di Siracusa                         | Sicily          |
| OGN9        | Ognina di Siracusa                         | Sicily          |
| MON8        | Mondello                                   | Sicily          |
| ELB9        | Capo Enfola                                | Elba Island     |
| VSM3        | Villasimius                                | Sardinia        |
| MLZ6        | Milazzo                                    | Sicily          |
| MON3        | Mondello                                   | Sicily          |
| MON6        | Mondello                                   | Sicily          |
| MON7        | Mondello                                   | Sicily          |
| MON11       | Mondello                                   | Sicily          |
| IMV44       | Isola di Mal di Ventre                     | Sardinia        |
| MLZ4        | Milazzo                                    | Sicily          |
| MLZ8        | Milazzo                                    | Sicily          |
| MLZ9        | Milazzo                                    | Sicily          |
| MLZ7        | Milazzo                                    | Sicily          |
| PAC5        | Pachino (Capo Passero)                     | Sicily          |
| PAC7        | Pachino (Capo Passero)                     | Sicily          |
| SVC6        | San Vito lo Capo (Secca di Cala Rossa)     | Sicily          |
| IMV42       | Isola di Mal di Ventre                     | Sardinia        |
| VEN21       | Ottagono Alberoni and Santa Maria del Lago | Venetian Lagoon |
| MAD12       | Isola di La Maddalena (Cala Camiciotto)    | Sardinia        |
| ALI11       | Alicante                                   | Spain           |
| ORI11       | Oristano                                   | Sardinia        |
| ORI25       | Oristano                                   | Sardinia        |
| IPI1        | Isola Piana                                | Corsica         |
| IPI2        | Isola Piana                                | Corsica         |
| MAD13       | Isola di La Maddalena (Cala Camiciotto)    | Sardinia        |
| MAD15       | Isola di La Maddalena (Cala Camiciotto)    | Sardinia        |
| ORI24       | Oristano                                   | Sardinia        |
| VEN11       | Ottagono Alberoni and Santa Maria del Lago | Venetian Lagoon |
| VEN15       | Ottagono Alberoni and Santa Maria del Lago | Venetian Lagoon |
| VEN16       | Ottagono Alberoni and Santa Maria del Lago | Venetian Lagoon |
| VEN210      | Ottagono Alberoni and Santa Maria del Lago | Venetian Lagoon |
| OTT5        | Porto Ottiolu                              | Sardinia        |
| OSM11       | Ospedale Marino                            | Sardinia        |
| OSM12       | Ospedale Marino                            | Sardinia        |
| OSM14       | Ospedale Marino                            | Sardinia        |
| OSM18       | Ospedale Marino                            | Sardinia        |
| OSM24       | Ospedale Marino                            | Sardinia        |
| OSM25       | Ospedale Marino                            | Sardinia        |
| OTT1        | Porto Ottiolu                              | Sardinia        |
| IBI12       | Ibiza                                      | Spain           |
| VEN13       | Ottagono Alberoni and Santa Maria del Lago | Venetian Lagoon |
| VEN17       | Ottagono Alberoni and Santa Maria del Lago | Venetian Lagoon |
| VEN28       | Ottagono Alberoni and Santa Maria del Lago | Venetian Lagoon |
| VEN29       | Ottagono Alberoni and Santa Maria del Lago | Venetian Lagoon |
| VEN110      | Ottagono Alberoni and Santa Maria del Lago | Venetian Lagoon |
| VEN22       | Ottagono Alberoni and Santa Maria del Lago | Venetian Lagoon |
| VEN23       | Ottagono Alberoni and Santa Maria del Lago | Venetian Lagoon |
| VEN26       | Ottagono Alberoni and Santa Maria del Lago | Venetian Lagoon |
| VEN19       | Ottagono Alberoni and Santa Maria del Lago | Venetian Lagoon |

| BIZ1               | Bizerta Lagoon                                                              | Tunisia                  |
|--------------------|-----------------------------------------------------------------------------|--------------------------|
| CYP1               | Karaoglanoglu                                                               | Cyprus                   |
| CYP2               | Karaoglanoglu                                                               | Cyprus                   |
| SAL1               | Le Saline                                                                   | Sardinia                 |
| SAL2               | Le Saline                                                                   | Sardinia                 |
| SAL3               | Le Saline                                                                   | Sardinia                 |
| SAL5               | Le Saline                                                                   | Sardinia                 |
| OGN2               | Ognina di Siracusa                                                          | Sicily                   |
| OGN10              | Ognina di Siracusa                                                          | Sicily                   |
| OGN15              | Ognina di Siracusa                                                          | Sicily                   |
| MAR31              | Marceddì                                                                    | Sardinia                 |
| MAR34              | Marceddì                                                                    | Sardinia                 |
| MAR35              | Marceddì                                                                    | Sardinia                 |
| CCE4               | Capo Ceraso                                                                 | Sardinia                 |
| CCE21              | Capo Ceraso                                                                 | Sardinia                 |
| CCE26              | Capo Ceraso                                                                 | Sardinia                 |
| MIR5               | Miramare (Gulf of Trieste)                                                  | Friuli-Venezia<br>Giulia |
| MIR8               | Miramare (Gulf of Trieste)                                                  | Friuli-Venezia<br>Giulia |
| MIR15              | Miramare (Gulf of Trieste)                                                  | Friuli-Venezia<br>Giulia |
| IMV41              | Isola di Mal di Ventre                                                      | Sardinia                 |
| IMV43              | Isola di Mal di Ventre                                                      | Sardinia                 |
| TEL5               | Telašćica - Island Buč                                                      | Croatia                  |
| MALL4              | Mallorca                                                                    | Spain                    |
| EPT2               | Epanomi                                                                     | Aegean Sea               |
| EPA4               | Epanomi                                                                     | Aegean Sea               |
| MAD7               | Isola di La Maddalena (Cala Camiciotto)                                     | Sardinia                 |
| BPC91              | Baia di Porto Conte                                                         | Sardinia                 |
| BPC102             | Baia di Porto Conte                                                         | Sardinia                 |
| CPC1               | Cala Pesciu Cane                                                            | Corsica                  |
| CPC7               | Cala Pesciu Cane                                                            | Corsica                  |
| VSM2               | Villasimius                                                                 | Sardinia                 |
| VSM1               | Villasimius                                                                 | Sardinia                 |
| MPE3               | Monte Petrosu (Sassi piatti and Isola Cava)                                 | Sardinia                 |
| TUN9               | Bizerta Lagoon; Monastir; Kerkennah Island; El Bibane Lagoon; El<br>Ketef * | Tunisia                  |
| ALI9               | Alicante                                                                    | Spain                    |
| OSR6               | Ossario                                                                     | Sardinia                 |
| OSR9               | Ossario                                                                     | Sardinia                 |
| ASI11              | Cala di Scombro di Dentro and Cala Reale                                    | Sardinia                 |
| ELB5               | Capo Enfola                                                                 | Sicily                   |
| ELB7               | Capo Enfola                                                                 | Sicily                   |
| ELB8               | Capo Enfola                                                                 | Sicily                   |
| MLJ6               | Mljet - Lake Malo Jezero                                                    | Croatia                  |
| MLJ8               | Mljet - Lake Malo Jezero                                                    | Croatia                  |
| MLJ20              | Mljet - Lake Malo Jezero                                                    | Croatia                  |
| MLJ31              | Mljet - Lake Malo Jezero                                                    | Croatia                  |
| MLJ33              | Mljet - Lake Malo Jezero                                                    | Croatia                  |
| <b>G2</b>          |                                                                             |                          |
| <b>Sample code</b> | <b>Sampling site</b>                                                        | <b>Sampling Area</b>     |
| TUN61              | Bizerta Lagoon; Monastir; Kerkennah Island; El Bibane Lagoon; El<br>Ketef * | Tunisia                  |
| TUN62              | Bizerta Lagoon; Monastir; Kerkennah Island; El Bibane Lagoon; El<br>Ketef * | Tunisia                  |
| MON10              | Mondello                                                                    | Sicily                   |
| EPA5               | Epanomi                                                                     | Aegean Sea               |

|        |                                                                          |            |
|--------|--------------------------------------------------------------------------|------------|
| EPT5   | Epanomi                                                                  | Aegean Sea |
| MLJ17  | Mljet - Lake Malo Jezero                                                 | Croatia    |
| IBI11  | Ibiza                                                                    | Spain      |
| TEL11  | Telašćica - Island Buč                                                   | Croatia    |
| EPT1   | Epanomi                                                                  | Aegean Sea |
| EPA3   | Epanomi                                                                  | Aegean Sea |
| EPA6   | Epanomi                                                                  | Aegean Sea |
| EPA7   | Epanomi                                                                  | Aegean Sea |
| EPA8   | Epanomi                                                                  | Aegean Sea |
| AGG1   | Aggelochori                                                              | Aegean Sea |
| AGG2   | Aggelochori                                                              | Aegean Sea |
| AGG3   | Aggelochori                                                              | Aegean Sea |
| AGG4   | Aggelochori                                                              | Aegean Sea |
| AGG5   | Aggelochori                                                              | Aegean Sea |
| AGG7   | Aggelochori                                                              | Aegean Sea |
| AGG8   | Aggelochori                                                              | Aegean Sea |
| AGG9   | Aggelochori                                                              | Aegean Sea |
| AGG10  | Aggelochori                                                              | Aegean Sea |
| XIO1   | Xios Island                                                              | Aegean Sea |
| XIO2   | Xios Island                                                              | Aegean Sea |
| XIO3   | Xios Island                                                              | Aegean Sea |
| XIO4   | Xios Island                                                              | Aegean Sea |
| XIO5   | Xios Island                                                              | Aegean Sea |
| KOR1   | Korinthiakos Gulf                                                        | Aegean Sea |
| KOR2   | Korinthiakos Gulf                                                        | Aegean Sea |
| KOR3   | Korinthiakos Gulf                                                        | Aegean Sea |
| TUN11  | Bizerta Lagoon; Monastir; Kerkennah Island; El Bibane Lagoon; El Ketef * | Tunisia    |
| TUN12  | Bizerta Lagoon; Monastir; Kerkennah Island; El Bibane Lagoon; El Ketef * | Tunisia    |
| TUN13  | Bizerta Lagoon; Monastir; Kerkennah Island; El Bibane Lagoon; El Ketef * | Tunisia    |
| TUN14  | Bizerta Lagoon; Monastir; Kerkennah Island; El Bibane Lagoon; El Ketef * | Tunisia    |
| TUN15  | Bizerta Lagoon; Monastir; Kerkennah Island; El Bibane Lagoon; El Ketef * | Tunisia    |
| TUN16  | Bizerta Lagoon; Monastir; Kerkennah Island; El Bibane Lagoon; El Ketef * | Tunisia    |
| TUN17  | Bizerta Lagoon; Monastir; Kerkennah Island; El Bibane Lagoon; El Ketef * | Tunisia    |
| TUN18  | Bizerta Lagoon; Monastir; Kerkennah Island; El Bibane Lagoon; El Ketef * | Tunisia    |
| TUN19  | Bizerta Lagoon; Monastir; Kerkennah Island; El Bibane Lagoon; El Ketef * | Tunisia    |
| TUN110 | Bizerta Lagoon; Monastir; Kerkennah Island; El Bibane Lagoon; El Ketef * | Tunisia    |
| TUN111 | Bizerta Lagoon; Monastir; Kerkennah Island; El Bibane Lagoon; El Ketef * | Tunisia    |
| TUN112 | Bizerta Lagoon; Monastir; Kerkennah Island; El Bibane Lagoon; El Ketef * | Tunisia    |
| TUN113 | Bizerta Lagoon; Monastir; Kerkennah Island; El Bibane Lagoon; El Ketef * | Tunisia    |
| TUN114 | Bizerta Lagoon; Monastir; Kerkennah Island; El Bibane Lagoon; El Ketef * | Tunisia    |
| TUN115 | Bizerta Lagoon; Monastir; Kerkennah Island; El Bibane Lagoon; El Ketef * | Tunisia    |
| TUN116 | Bizerta Lagoon; Monastir; Kerkennah Island; El Bibane Lagoon; El Ketef * | Tunisia    |

[illegible]

|       |                                                                          |                 |
|-------|--------------------------------------------------------------------------|-----------------|
| TUN10 | Bizerta Lagoon; Monastir; Kerkennah Island; El Bibane Lagoon; El Ketef * | Tunisia         |
| TEL2  | Telašćica - Island Buč - Island Buč                                      | Croatia         |
| TEL3  | Telašćica - Island Buč                                                   | Croatia         |
| TEL4  | Telašćica - Island Buč                                                   | Croatia         |
| TEL6  | Telašćica - Island Buč                                                   | Croatia         |
| TEL7  | Telašćica - Island Buč                                                   | Croatia         |
| TEL8  | Telašćica - Island Buč                                                   | Croatia         |
| TEL9  | Telašćica - Island Buč                                                   | Croatia         |
| TEL12 | Telašćica - Island Buč                                                   | Croatia         |
| TEL13 | Telašćica - Island Buč                                                   | Croatia         |
| TEL14 | Telašćica - Island Buč                                                   | Croatia         |
| MLJ1  | Mljet - Lake Malo Jezero                                                 | Croatia         |
| MLJ3  | Mljet - Lake Malo Jezero                                                 | Croatia         |
| MLJ11 | Mljet - Lake Malo Jezero                                                 | Croatia         |
| MLJ15 | Mljet - Lake Malo Jezero                                                 | Croatia         |
| MLJ18 | Mljet - Lake Malo Jezero                                                 | Croatia         |
| MLJ23 | Mljet - Lake Malo Jezero                                                 | Croatia         |
| MLJ24 | Mljet - Lake Malo Jezero                                                 | Croatia         |
| MLJ27 | Mljet - Lake Malo Jezero                                                 | Croatia         |
| MLJ29 | Mljet - Lake Malo Jezero                                                 | Croatia         |
| MLJ32 | Mljet - Lake Malo Jezero                                                 | Croatia         |
| MLJ34 | Mljet - Lake Malo Jezero                                                 | Croatia         |
| MLJ35 | Mljet - Lake Malo Jezero                                                 | Croatia         |
| VEN18 | Ottagono Alberoni and Santa Maria del Lago                               | Venetian Lagoon |
| VEN25 | Ottagono Alberoni and Santa Maria del Lago                               | Venetian Lagoon |
| VEN27 | Ottagono Alberoni and Santa Maria del Lago                               | Venetian Lagoon |
| OSR1  | Ossario                                                                  | Sardinia        |
| OSR2  | Ossario                                                                  | Sardinia        |
| OSR3  | Ossario                                                                  | Sardinia        |
| OSR4  | Ossario                                                                  | Sardinia        |
| OSR5  | Ossario                                                                  | Sardinia        |
| OSR8  | Ossario                                                                  | Sardinia        |
| OSR10 | Ossario                                                                  | Sardinia        |
| OSR11 | Ossario                                                                  | Sardinia        |
| OSR12 | Ossario                                                                  | Sardinia        |
| ASI1  | Cala di Scombro di Dentro and Cala Reale                                 | Sardinia        |
| ASI2  | Cala di Scombro di Dentro and Cala Reale                                 | Sardinia        |
| ASI4  | Cala di Scombro di Dentro and Cala Reale                                 | Sardinia        |
| ASI5  | Cala di Scombro di Dentro and Cala Reale                                 | Sardinia        |
| ASI6  | Cala di Scombro di Dentro and Cala Reale                                 | Sardinia        |
| ASI7  | Cala di Scombro di Dentro and Cala Reale                                 | Sardinia        |
| ASI8  | Cala di Scombro di Dentro and Cala Reale                                 | Sardinia        |
| ASI10 | Cala di Scombro di Dentro and Cala Reale                                 | Sardinia        |
| ASI12 | Cala di Scombro di Dentro and Cala Reale                                 | Sardinia        |
| ASI13 | Cala di Scombro di Dentro and Cala Reale                                 | Sardinia        |
| ASI14 | Cala di Scombro di Dentro and Cala Reale                                 | Sardinia        |
| ASI15 | Cala di Scombro di Dentro and Cala Reale                                 | Sardinia        |
| ASI16 | Cala di Scombro di Dentro and Cala Reale                                 | Sardinia        |
| ASI17 | Cala di Scombro di Dentro and Cala Reale                                 | Sardinia        |
| ASI18 | Cala di Scombro di Dentro and Cala Reale                                 | Sardinia        |
| ASI19 | Cala di Scombro di Dentro and Cala Reale                                 | Sardinia        |
| ASI20 | Cala di Scombro di Dentro and Cala Reale                                 | Sardinia        |
| ASI21 | Cala di Scombro di Dentro and Cala Reale                                 | Sardinia        |
| ASI22 | Cala di Scombro di Dentro and Cala Reale                                 | Sardinia        |
| ASI25 | Cala di Scombro di Dentro and Cala Reale                                 | Sardinia        |
| ASI24 | Cala di Scombro di Dentro and Cala Reale                                 | Sardinia        |
| ASI23 | Cala di Scombro di Dentro and Cala Reale                                 | Sardinia        |

|        |                                         |          |
|--------|-----------------------------------------|----------|
| ASI26  | Cala di Sombro di Dentro and Cala Reale | Sardinia |
| ASI28  | Cala di Sombro di Dentro and Cala Reale | Sardinia |
| ASI29  | Cala di Sombro di Dentro and Cala Reale | Sardinia |
| ASI31  | Cala di Sombro di Dentro and Cala Reale | Sardinia |
| ASI32  | Cala di Sombro di Dentro and Cala Reale | Sardinia |
| ASI33  | Cala di Sombro di Dentro and Cala Reale | Sardinia |
| ASI34  | Cala di Sombro di Dentro and Cala Reale | Sardinia |
| ASI35  | Cala di Sombro di Dentro and Cala Reale | Sardinia |
| ASI36  | Cala di Sombro di Dentro and Cala Reale | Sardinia |
| ASI37  | Cala di Sombro di Dentro and Cala Reale | Sardinia |
| ASI38  | Cala di Sombro di Dentro and Cala Reale | Sardinia |
| BAN5   | Banyuls                                 | Spain    |
| BAN16  | Banyuls                                 | Spain    |
| BAN1   | Banyuls                                 | Spain    |
| EBR18  | Ebro Delta                              | Spain    |
| EBR21  | Ebro Delta                              | Spain    |
| EBR22  | Ebro Delta                              | Spain    |
| IBI4   | Ibiza                                   | Spain    |
| IBI5   | Ibiza                                   | Spain    |
| IBI6   | Ibiza                                   | Spain    |
| IBI7   | Ibiza                                   | Spain    |
| IBI8   | Ibiza                                   | Spain    |
| IBI9   | Ibiza                                   | Spain    |
| IBI10  | Ibiza                                   | Spain    |
| MUR3   | Murcia                                  | Spain    |
| MUR7   | Murcia                                  | Spain    |
| MUR15  | Murcia                                  | Spain    |
| MUR19  | Murcia                                  | Spain    |
| MALL3  | Mallorca                                | Spain    |
| MALL5  | Mallorca                                | Spain    |
| MALL6  | Mallorca                                | Spain    |
| MALL8  | Mallorca                                | Spain    |
| ALI5   | Alicante                                | Spain    |
| BAN21  | Banyuls                                 | Spain    |
| EBR8   | Ebro Delta                              | Spain    |
| EBR13  | Ebro Delta                              | Spain    |
| EBR19  | Ebro Delta                              | Spain    |
| IBI3   | Ibiza                                   | Spain    |
| MALL1  | Mallorca                                | Spain    |
| MALL7  | Mallorca                                | Spain    |
| MALL9  | Mallorca                                | Spain    |
| ALI13  | Alicante                                | Spain    |
| ALI16  | Alicante                                | Spain    |
| ALI4   | Alicante                                | Spain    |
| EBR4   | Ebro Delta                              | Spain    |
| MUR10  | Murcia                                  | Spain    |
| BAN14  | Banyuls                                 | Spain    |
| BAN15  | Banyuls                                 | Spain    |
| BAN19  | Banyuls                                 | Spain    |
| ALI8   | Alicante                                | Spain    |
| ALI3   | Alicante                                | Spain    |
| EBR5   | Ebro Delta                              | Spain    |
| EBR6   | Ebro Delta                              | Spain    |
| MUR13  | Murcia                                  | Spain    |
| MALL10 | Mallorca                                | Spain    |
| MALL2  | Mallorca                                | Spain    |
| BAN3   | Banyuls                                 | Spain    |
| BAN4   | Banyuls                                 | Spain    |

|        |                                             |          |
|--------|---------------------------------------------|----------|
| MUR11  | Murcia                                      | Spain    |
| MUR14  | Murcia                                      | Spain    |
| MUR16  | Murcia                                      | Spain    |
| BPC1   | Baia di Porto Conte                         | Sardinia |
| BPC25  | Baia di Porto Conte                         | Sardinia |
| BPC28  | Baia di Porto Conte                         | Sardinia |
| BPC38  | Baia di Porto Conte                         | Sardinia |
| BPC45  | Baia di Porto Conte                         | Sardinia |
| BPC51  | Baia di Porto Conte                         | Sardinia |
| BPC52  | Baia di Porto Conte                         | Sardinia |
| BPC72  | Baia di Porto Conte                         | Sardinia |
| BPC81  | Baia di Porto Conte                         | Sardinia |
| BPC101 | Baia di Porto Conte                         | Sardinia |
| BPC111 | Baia di Porto Conte                         | Sardinia |
| BPC121 | Baia di Porto Conte                         | Sardinia |
| BPC122 | Baia di Porto Conte                         | Sardinia |
| BPC131 | Baia di Porto Conte                         | Sardinia |
| BPC132 | Baia di Porto Conte                         | Sardinia |
| POR11  | Torre del Porticciolo                       | Sardinia |
| POR12  | Torre del Porticciolo                       | Sardinia |
| LAZ152 | Lazzareto                                   | Sardinia |
| OSM1   | Ospedale Marino                             | Sardinia |
| OSM3   | Ospedale Marino                             | Sardinia |
| OSM4   | Ospedale Marino                             | Sardinia |
| OSM5   | Ospedale Marino                             | Sardinia |
| OSM6   | Ospedale Marino                             | Sardinia |
| OSM7   | Ospedale Marino                             | Sardinia |
| OSM9   | Ospedale Marino                             | Sardinia |
| OSM13  | Ospedale Marino                             | Sardinia |
| OSM17  | Ospedale Marino                             | Sardinia |
| OSM19  | Ospedale Marino                             | Sardinia |
| OSM22  | Ospedale Marino                             | Sardinia |
| OSM26  | Ospedale Marino                             | Sardinia |
| OSM27  | Ospedale Marino                             | Sardinia |
| MOL1   | Molara                                      | Sardinia |
| MOL3   | Molara                                      | Sardinia |
| MOL6   | Molara                                      | Sardinia |
| MOL7   | Molara                                      | Sardinia |
| MOL8   | Molara                                      | Sardinia |
| MOL12  | Molara                                      | Sardinia |
| CCE1   | Capo Ceraso                                 | Sardinia |
| CCE2   | Capo Ceraso                                 | Sardinia |
| CCE3   | Capo Ceraso                                 | Sardinia |
| CCE5   | Capo Ceraso                                 | Sardinia |
| CCE22  | Capo Ceraso                                 | Sardinia |
| CCE23  | Capo Ceraso                                 | Sardinia |
| CCE24  | Capo Ceraso                                 | Sardinia |
| CCE25  | Capo Ceraso                                 | Sardinia |
| CCE27  | Capo Ceraso                                 | Sardinia |
| CCE212 | Capo Ceraso                                 | Sardinia |
| SAL4   | Le Saline                                   | Sardinia |
| MPE1   | Monte Petrosu (Sassi piatti and Isola Cava) | Sardinia |
| MPE2   | Monte Petrosu (Sassi piatti and Isola Cava) | Sardinia |
| MPE21  | Monte Petrosu (Sassi piatti and Isola Cava) | Sardinia |
| OTT2   | Porto Ottiolu                               | Sardinia |
| OTT4   | Porto Ottiolu                               | Sardinia |
| ORI12  | Oristano                                    | Sardinia |
| ORI13  | Oristano                                    | Sardinia |

|       |                                         |          |
|-------|-----------------------------------------|----------|
| ORI14 | Oristano                                | Sardinia |
| ORI15 | Oristano                                | Sardinia |
| ORI21 | Oristano                                | Sardinia |
| ORI22 | Oristano                                | Sardinia |
| ORI23 | Oristano                                | Sardinia |
| MAR32 | Marceddì                                | Sardinia |
| VSM2  | Villasimius                             | Sardinia |
| VSM4  | Villasimius                             | Sardinia |
| CPA2  | Costa Paradiso                          | Sardinia |
| CPA3  | Costa Paradiso                          | Sardinia |
| CPA4  | Costa Paradiso                          | Sardinia |
| CPA5  | Costa Paradiso                          | Sardinia |
| MAD1  | Isola di La Maddalena (Cala Camiciotto) | Sardinia |
| MAD2  | Isola di La Maddalena (Cala Camiciotto) | Sardinia |
| MAD4  | Isola di La Maddalena (Cala Camiciotto) | Sardinia |
| MAD5  | Isola di La Maddalena (Cala Camiciotto) | Sardinia |
| MAD6  | Isola di La Maddalena (Cala Camiciotto) | Sardinia |
| MAD8  | Isola di La Maddalena (Cala Camiciotto) | Sardinia |
| MAD9  | Isola di La Maddalena (Cala Camiciotto) | Sardinia |
| MAD10 | Isola di La Maddalena (Cala Camiciotto) | Sardinia |
| MAD11 | Isola di La Maddalena (Cala Camiciotto) | Sardinia |
| MAD14 | Isola di La Maddalena (Cala Camiciotto) | Sardinia |
| MAD16 | Isola di La Maddalena (Cala Camiciotto) | Sardinia |
| MAD17 | Isola di La Maddalena (Cala Camiciotto) | Sardinia |
| MAD18 | Isola di La Maddalena (Cala Camiciotto) | Sardinia |
| IPI3  | Isola Piana                             | Corsica  |
| IPI4  | Isola Piana                             | Corsica  |
| IPI5  | Isola Piana                             | Corsica  |
| IPI6  | Isola Piana                             | Corsica  |
| IPI8  | Isola Piana                             | Corsica  |
| IPI9  | Isola Piana                             | Corsica  |
| IPI12 | Isola Piana                             | Corsica  |
| IPI14 | Isola Piana                             | Corsica  |
| CPC2  | Cala Pesciu Cane                        | Corsica  |
| CPC4  | Cala Pesciu Cane                        | Corsica  |
| CPC5  | Cala Pesciu Cane                        | Corsica  |
| CPC8  | Cala Pesciu Cane                        | Corsica  |
| CPC9  | Cala Pesciu Cane                        | Corsica  |
| CPC10 | Cala Pesciu Cane                        | Corsica  |
| CPC12 | Cala Pesciu Cane                        | Corsica  |
| CPC13 | Cala Pesciu Cane                        | Corsica  |
| CPC14 | Cala Pesciu Cane                        | Corsica  |
| SVC1  | San Vito lo Capo (Secca di Cala Rossa)  | Sicily   |
| SVC2  | San Vito lo Capo (Secca di Cala Rossa)  | Sicily   |
| SVC3  | San Vito lo Capo (Secca di Cala Rossa)  | Sicily   |
| SVC4  | San Vito lo Capo (Secca di Cala Rossa)  | Sicily   |
| SVC5  | San Vito lo Capo (Secca di Cala Rossa)  | Sicily   |
| SVC7  | San Vito lo Capo (Secca di Cala Rossa)  | Sicily   |
| MON1  | Mondello                                | Sicily   |
| MON2  | Mondello                                | Sicily   |
| MON4  | Mondello                                | Sicily   |
| MON5  | Mondello                                | Sicily   |
| MON9  | Mondello                                | Sicily   |
| MLZ1  | Milazzo                                 | Sicily   |
| MLZ2  | Milazzo                                 | Sicily   |
| MLZ5  | Milazzo                                 | Sicily   |
| PAC1  | Pachino (Capo Passero)                  | Sicily   |
| PAC2  | Pachino (Capo Passero)                  | Sicily   |



|       |                                            |                          |
|-------|--------------------------------------------|--------------------------|
| PAC4  | Pachino (Capo Passero)                     | Sicily                   |
| PAC6  | Pachino (Capo Passero)                     | Sicily                   |
| PAC8  | Pachino (Capo Passero)                     | Sicily                   |
| OGN1  | Ognina di Siracusa                         | Sicily                   |
| OGN3  | Ognina di Siracusa                         | Sicily                   |
| OGN4  | Ognina di Siracusa                         | Sicily                   |
| OGN5  | Ognina di Siracusa                         | Sicily                   |
| OGN6  | Ognina di Siracusa                         | Sicily                   |
| OGN7  | Ognina di Siracusa                         | Sicily                   |
| OGN11 | Ognina di Siracusa                         | Sicily                   |
| OGN12 | Ognina di Siracusa                         | Sicily                   |
| OGN13 | Ognina di Siracusa                         | Sicily                   |
| OGN14 | Ognina di Siracusa                         | Sicily                   |
| ELB3  | Capo Enfoła                                | Sicily                   |
| ELB4  | Capo Enfoła                                | Sicily                   |
| ELB6  | Capo Enfoła                                | Sicily                   |
| MIR1  | Miramare (Gulf of Trieste)                 | Friuli-Venezia<br>Giulia |
| MIR2  | Miramare (Gulf of Trieste)                 | Friuli-Venezia<br>Giulia |
| MIR3  | Miramare (Gulf of Trieste)                 | Friuli-Venezia<br>Giulia |
| MIR4  | Miramare (Gulf of Trieste)                 | Friuli-Venezia<br>Giulia |
| MIR6  | Miramare (Gulf of Trieste)                 | Friuli-Venezia<br>Giulia |
| MIR7  | Miramare (Gulf of Trieste)                 | Friuli-Venezia<br>Giulia |
| MIR9  | Miramare (Gulf of Trieste)                 | Friuli-Venezia<br>Giulia |
| MIR10 | Miramare (Gulf of Trieste)                 | Friuli-Venezia<br>Giulia |
| MIR11 | Miramare (Gulf of Trieste)                 | Friuli-Venezia<br>Giulia |
| MIR12 | Miramare (Gulf of Trieste)                 | Friuli-Venezia<br>Giulia |
| MIR13 | Miramare (Gulf of Trieste)                 | Friuli-Venezia<br>Giulia |
| MIR14 | Miramare (Gulf of Trieste)                 | Friuli-Venezia<br>Giulia |
| MIR16 | Miramare (Gulf of Trieste)                 | Friuli-Venezia<br>Giulia |
| MIR17 | Miramare (Gulf of Trieste)                 | Friuli-Venezia<br>Giulia |
| MIR18 | Miramare (Gulf of Trieste)                 | Friuli-Venezia<br>Giulia |
| MOL9  | Molara                                     | Sardinia                 |
| TEL1  | Telašćica - Island Buč                     | Croatia                  |
| MLZ3  | Milazzo                                    | Sicily                   |
| MOL5  | Molara                                     | Sardinia                 |
| MOL2  | Molara                                     | Sardinia                 |
| MOL4  | Molara                                     | Sardinia                 |
| TEL10 | Telašćica - Island Buč                     | Croatia                  |
| MOL11 | Molara                                     | Sardinia                 |
| MLZ10 | Milazzo                                    | Sicily                   |
| VEN24 | Ottagono Alberoni and Santa Maria del Lago | Venetian Lagoon          |
| ELB1  | Capo Enfoła                                | Sicily                   |
| ELB2  | Capo Enfoła                                | Sicily                   |

|        |                                          |          |
|--------|------------------------------------------|----------|
| ELB10  | Capo Enfola                              | Sicily   |
| CPC11  | Cala Pesciu Cane                         | Corsica  |
| BPC82  | Baia di Porto Conte                      | Sardinia |
| POR13  | Torre del Porticciolo                    | Sardinia |
| ALI1   | Alicante                                 | Spain    |
| ALI14  | Alicante                                 | Spain    |
| CPA1   | Costa Paradiso                           | Sardinia |
| IPI10  | Isola Piana                              | Corsica  |
| IPI11  | Isola Piana                              | Corsica  |
| IPI15  | Isola Piana                              | Corsica  |
| LAZ151 | Lazzareto                                | Sardinia |
| PAC3   | Pachino (Capo Passero)                   | Sicily   |
| MAD3   | Isola di La Maddalena (Cala Camiciotto)  | Sardinia |
| OTT3   | Porto Ottiolu                            | Sardinia |
| OSM8   | Ospedale Marino                          | Sardinia |
| ASI3   | Cala di Scombro di Dentro and Cala Reale | Sardinia |
| OSR7   | Ossario                                  | Sardinia |
| ASI9   | Cala di Scombro di Dentro and Cala Reale | Sardinia |
| ASI30  | Cala di Scombro di Dentro and Cala Reale | Sardinia |
| ASI27  | Cala di Scombro di Dentro and Cala Reale | Sardinia |

---
